# Supplementary figures and images for: k-Nearest neighbor models for microarray gene expression analysis and clinical outcome prediction
Source: PubMed Central journal article supplement — Pharmacogenomics J. 2010 Jul 30;10(4):292–309. doi: 10.1038/tpj.2010.56 (PMC2920072; doi:10.1038/tpj.2010.56), 2010-07-30

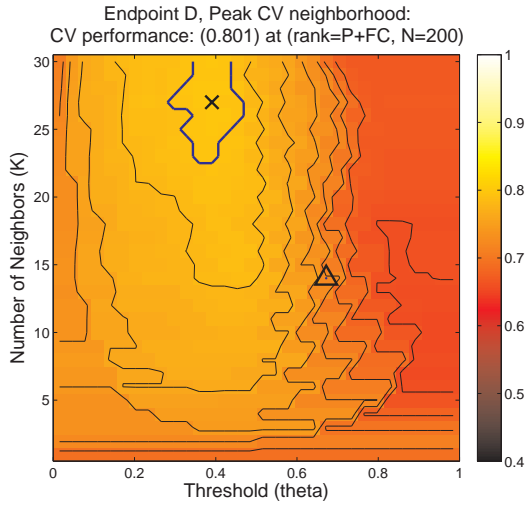

(a)

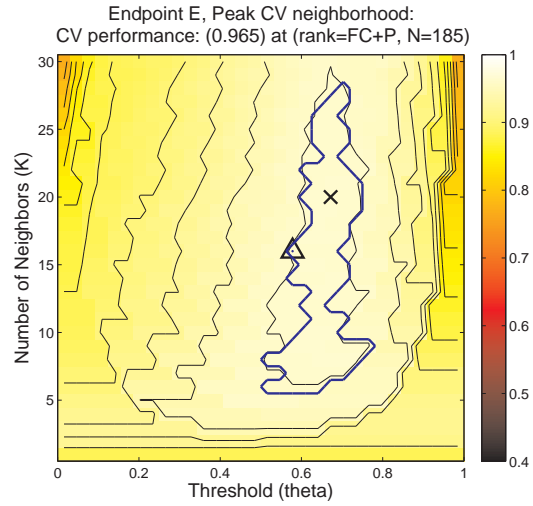

(b)

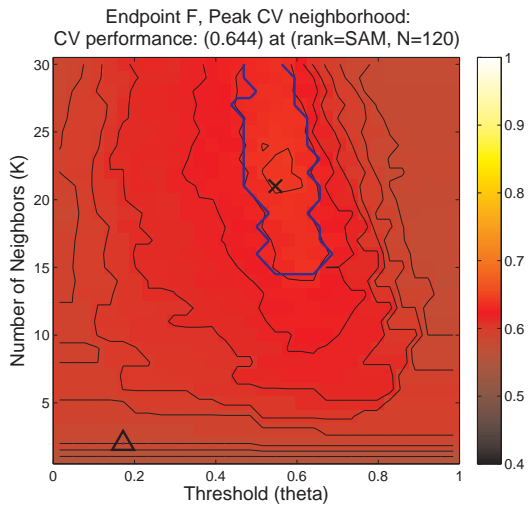

(c)

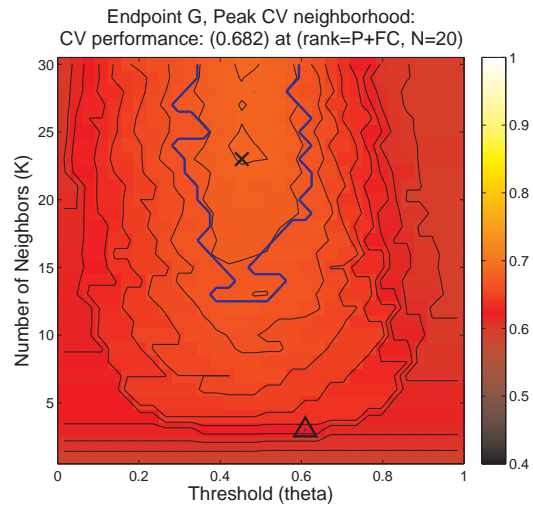

(d)

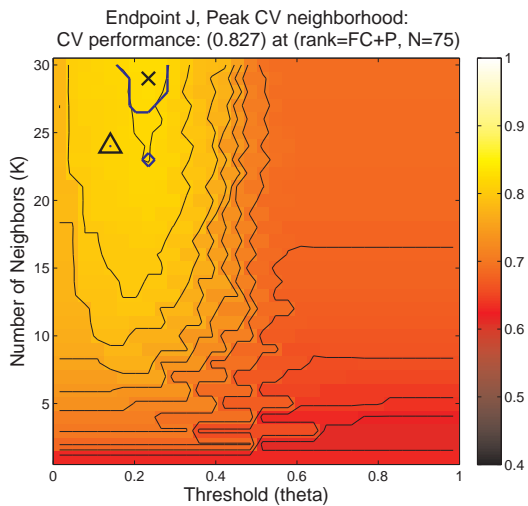

(e)

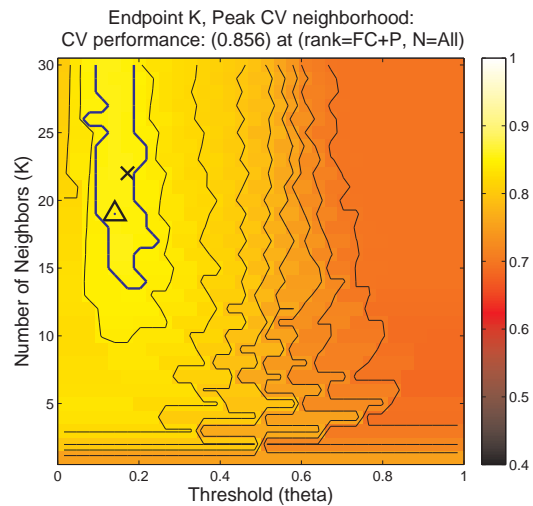

(f)

Supplement: tpj201056x2.pdf [file tpj201056x2.pdf]

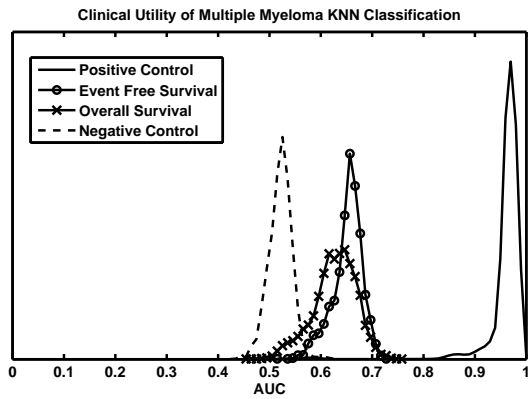

(a)

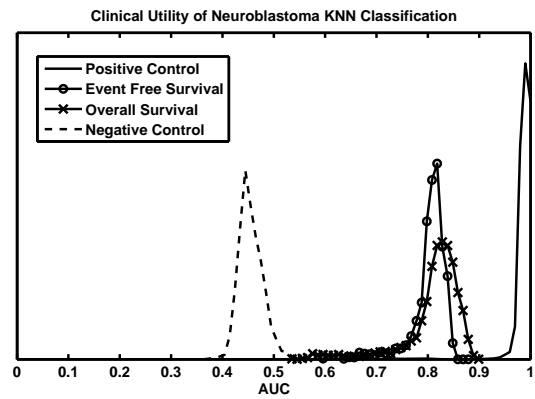

(b)

Supplement: tpj201056x4.pdf [file tpj201056x4.pdf]
